# Supplementary material
Source: Springer Nature journal article supplement (https://www.springermedizin.de/resource/supplementary/12885_2010_2750_MOESM3_ESM.pdf/9461886)

**PBL**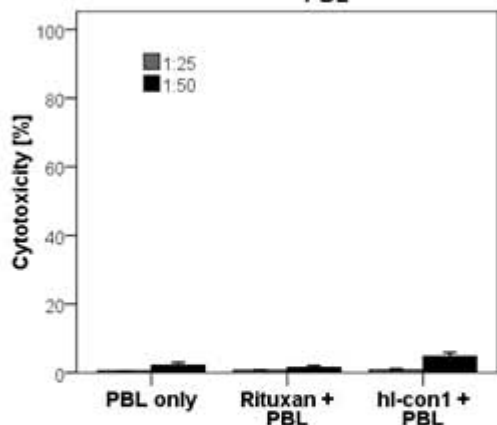**CVX-1 ARK-1**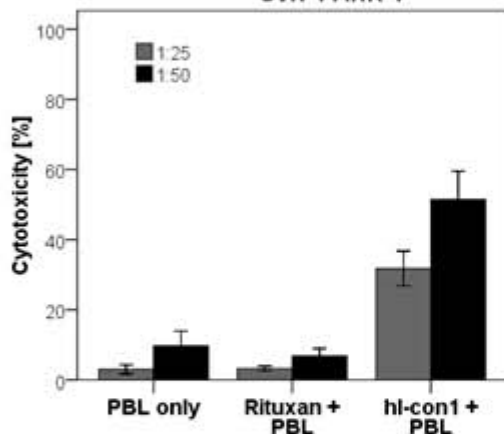**CVX-2 ARK-2**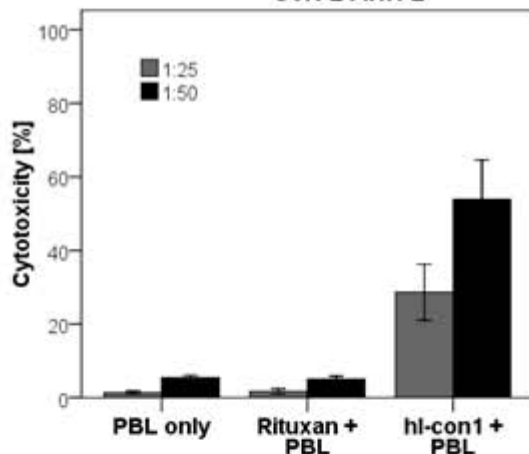**ADX-1 ARK-1**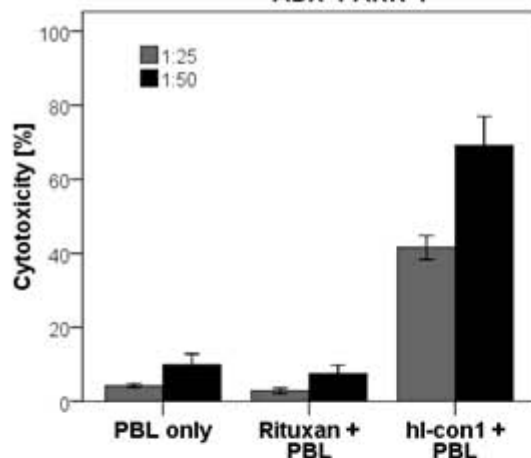

Supplement: MOESM3 [file 9461886]
